# Supplementary material
Source: publisher figshare collection journal article supplement (https://tandf.figshare.com/ndownloader/files/14359271)
Supplement: Supplementary file 1 [file 14359271]

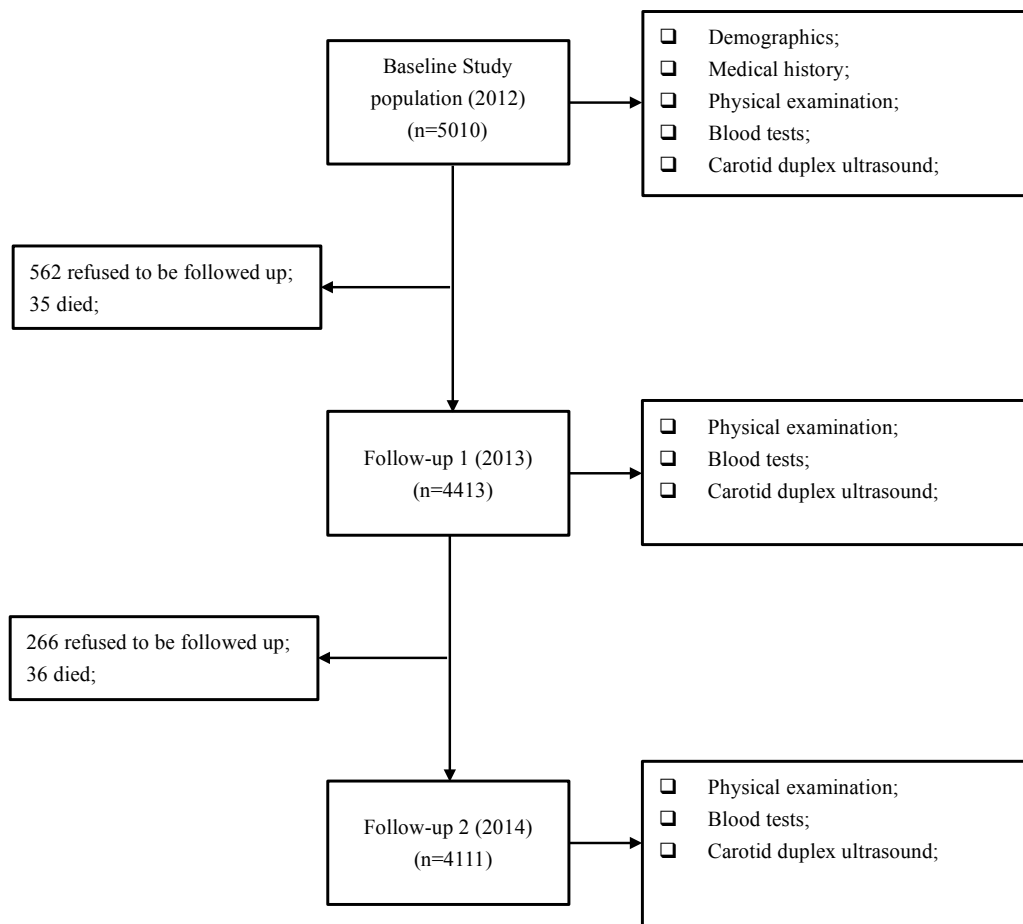

**Figure e-1. Participants flowchart**

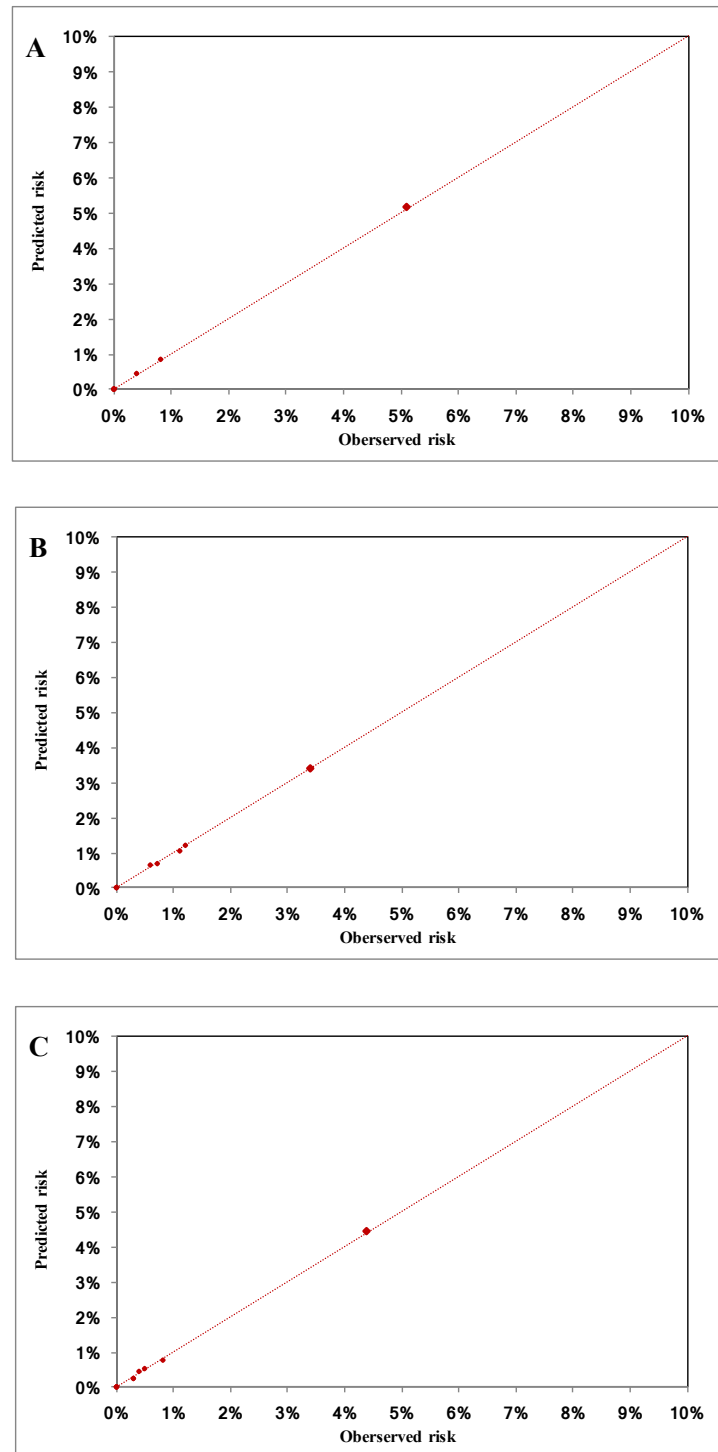

Figure e-2. Plot of observed versus predicted risk of progression of left carotid artery stenosis in the derivation, validation and overall study population

#### Figure e-2 legend

Plot of observed versus predicted risk of progression of left carotid artery stenosis according to 10 deciles of predicted risk. There was a high correlation between observed and predicted risk in the derivation cohort (A) ( $n=2465$ ;  $r=0.998$ ,  $P<0.001$ ) and validation cohort (B) ( $n=1646$ ;  $r=0.997$ ,  $P<0.001$ ), and overall cohort (C) ( $n=4111$ ;  $r=0.997$ ,  $P<0.001$ ).

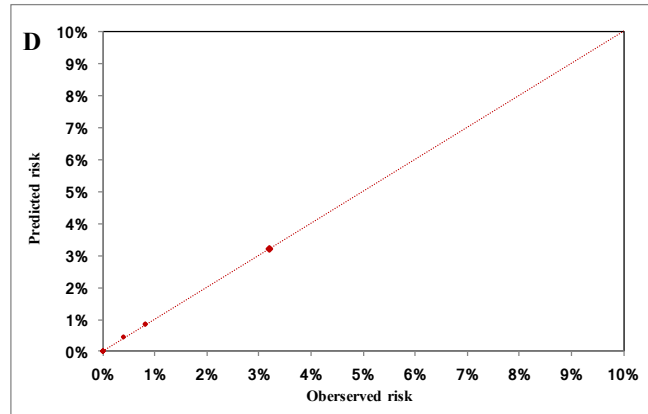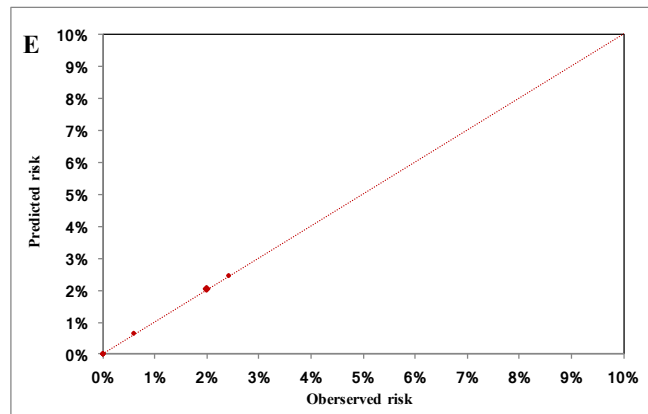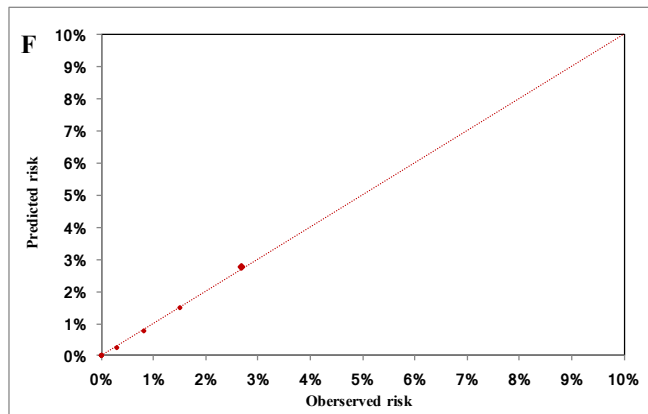

Figure e-3. Plot of observed versus predicted risk of progression of right carotid artery stenosis in the derivation, validation and overall study population

#### Figure e-3 legend

Plot of observed versus predicted risk of progression of right carotid artery stenosis according to 10 deciles of predicted risk. There was a high correlation between observed and predicted risk in the derivation cohort (A) ( $n=2465$ ;  $r=0.998$ ,  $P<0.001$ ) and validation cohort (B) ( $n=1646$ ;  $r=0.999$ ,  $P<0.001$ ), and overall cohort (C) ( $n=4111$ ;  $r=0.998$ ,  $P<0.001$ ).

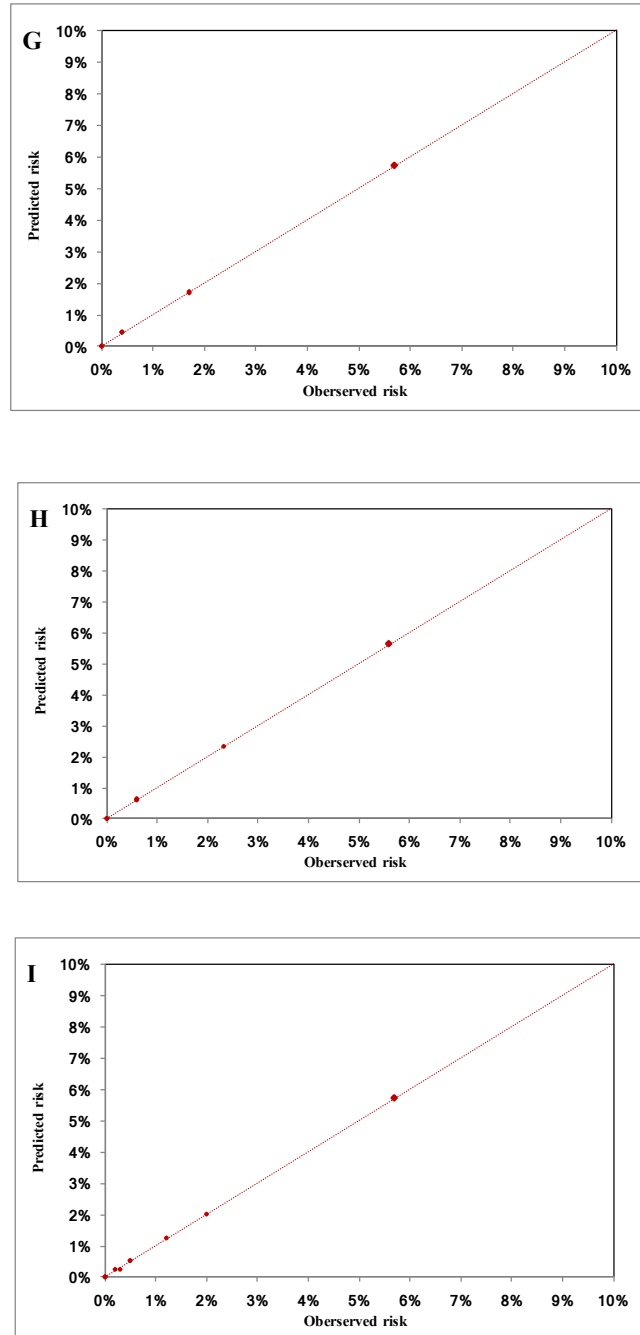

Figure e-4. Plot of observed versus predicted risk of progression of bilateral carotid artery stenosis in the derivation, validation and overall study population

#### Figure e-4 legend

Plot of observed versus predicted risk of progression of bilateral carotid artery stenosis according to 10 deciles of predicted risk. There was a high correlation between observed and predicted risk in the derivation cohort (A) ( $n=2465$ ;  $r=0.997$ ,  $P<0.001$ ) and validation cohort (B) ( $n=1646$ ;  $r=0.996$ ,  $P<0.001$ ), and overall cohort (C) ( $n=4111$ ;  $r=1.000$ ,  $P<0.001$ ).

**Table e-1. Sensitivity, specificity, PPV, NPV and accuracy of ECAS progression score at Younden index**

|                                   | AUROC | 95% C.I.    | P value | Youden Index | Sensitivity | Specificity | PPV   | NPV   |
|-----------------------------------|-------|-------------|---------|--------------|-------------|-------------|-------|-------|
| <b>Derivation cohort (n=2465)</b> |       |             |         |              |             |             |       |       |
| ECAS progression score-L          | 0.917 | 0.851-0.982 | <0.001  | 0.750        | 0.824       | 0.927       | 0.072 | 0.999 |
| ECAS progression score-R          | 0.868 | 0.791-0.945 | <0.001  | 0.541        | 0.600       | 0.941       | 0.059 | 0.997 |
| ECAS progression score-B          | 0.860 | 0.787-0.933 | <0.001  | 0.550        | 0.690       | 0.860       | 0.055 | 0.996 |
| <b>Validation cohort (n=1646)</b> |       |             |         |              |             |             |       |       |
| ECAS progression score-L          | 0.842 | 0.740-0.973 | <0.001  | 0.573        | 0.833       | 0.740       | 0.023 | 0.998 |
| ECAS progression score-R          | 0.832 | 0.707-0.957 | <0.001  | 0.633        | 0.889       | 0.744       | 0.019 | 0.999 |
| ECAS progression score-B          | 0.824 | 0.729-0.918 | <0.001  | 0.457        | 0.526       | 0.931       | 0.082 | 0.994 |
| <b>Overall cohort (n=4111)</b>    |       |             |         |              |             |             |       |       |
| ECAS progression score-L          | 0.886 | 0.828-0.944 | <0.001  | 0.580        | 0.655       | 0.925       | 0.058 | 0.997 |
| ECAS progression score-R          | 0.854 | 0.786-0.922 | <0.001  | 0.565        | 0.833       | 0.732       | 0.018 | 0.999 |
| ECAS progression score-B          | 0.846 | 0.788-0.904 | <0.001  | 0.506        | 0.646       | 0.860       | 0.052 | 0.995 |

Abbreviation; ECAS, extracranial cervical atherosclerotic stenosis; AUROC, Area Under the Receiver Operating Characteristic Curve; C.I., Confidence Interval; PPV, Positive Predictive Value; NPV, Negative Predictive Value; L, left side; R, right side; B-bilateral side.
